# Supplementary material for: Synthesis and Structure–Activity Relationship of 2,6-Disubstituted Thiosemicarbazone Derivatives of Pyridine as Potential Antituberculosis Agents
Source: MDPI journal article supplement (doi:10.3390/ma16010448), 2023-01-03
Supplement: s1 [file s1]

Supplementary

## Synthesis and structure–activity relationship of 2,6-disubstituted thiosemicarbazone derivatives of pyridine as potential antituberculosis agents

Dagmara Ziembicka \*, Katarzyna Gobis \*, Małgorzata Szczesio, Andrzej Olczak, Ewa Augustynowicz-Kopeć, Agnieszka Głogowska, Izabela Korona-Główniak and Krzysztof Bojanowski

Figures S1–S18 show  $^1\text{H}$  NMR and  $^{13}\text{C}$  NMR spectra of compounds 1–9.

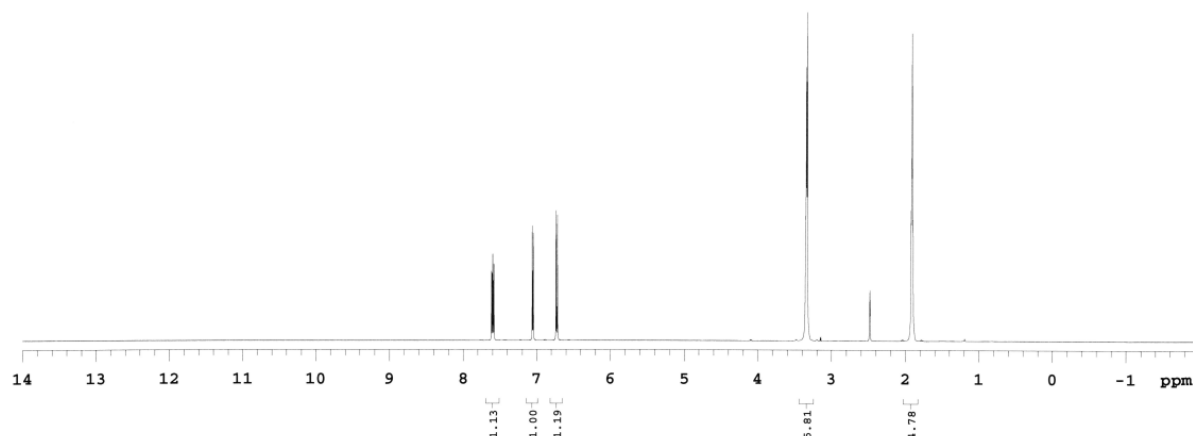

Figure S1.  $^1\text{H}$  NMR spectrum (500 MHz,  $\text{DMSO}-d_6$ ) of compound 1.

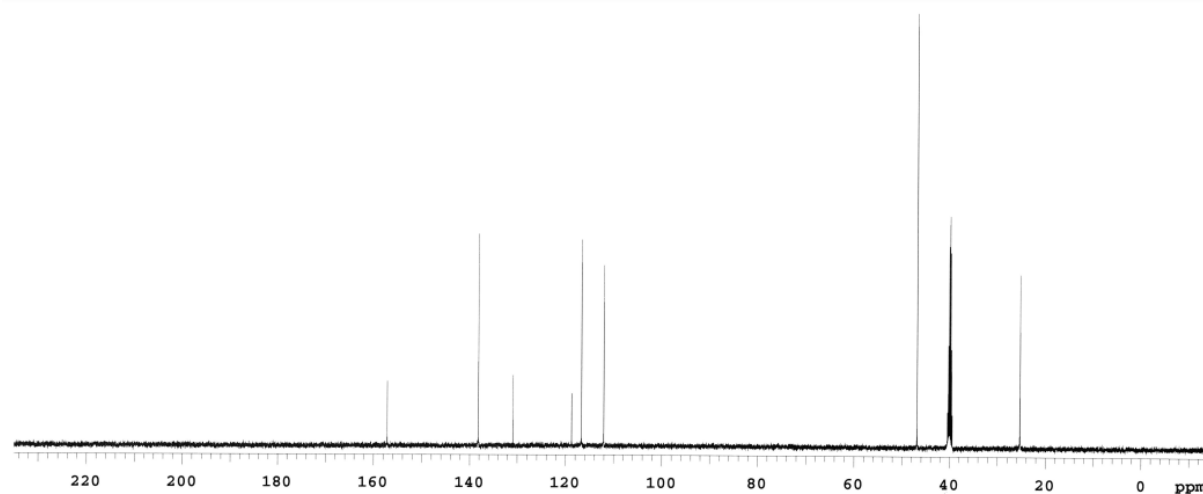

Figure S2.  $^{13}\text{C}$  NMR spectrum (125 MHz,  $\text{DMSO}-d_6$ ) of compound 1.

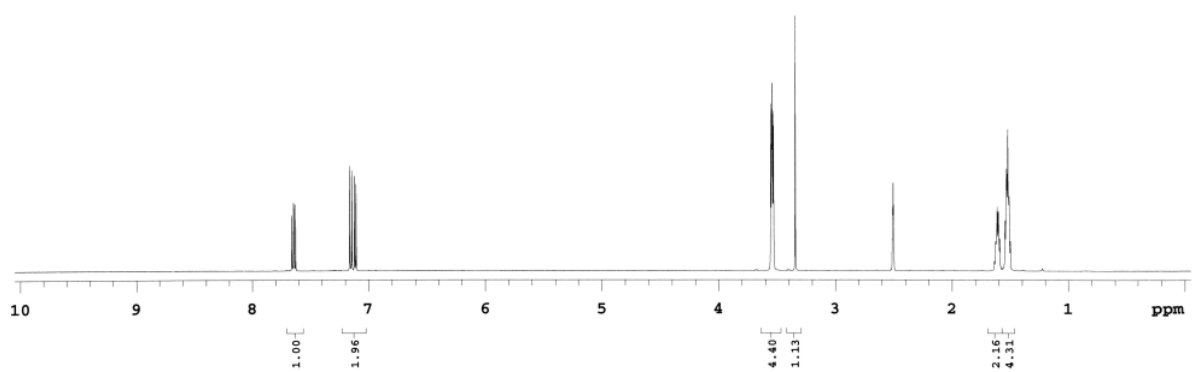

**Figure S3.** <sup>1</sup>H NMR spectrum (500 MHz, DMSO-*d*<sub>6</sub>) of compound **2**.

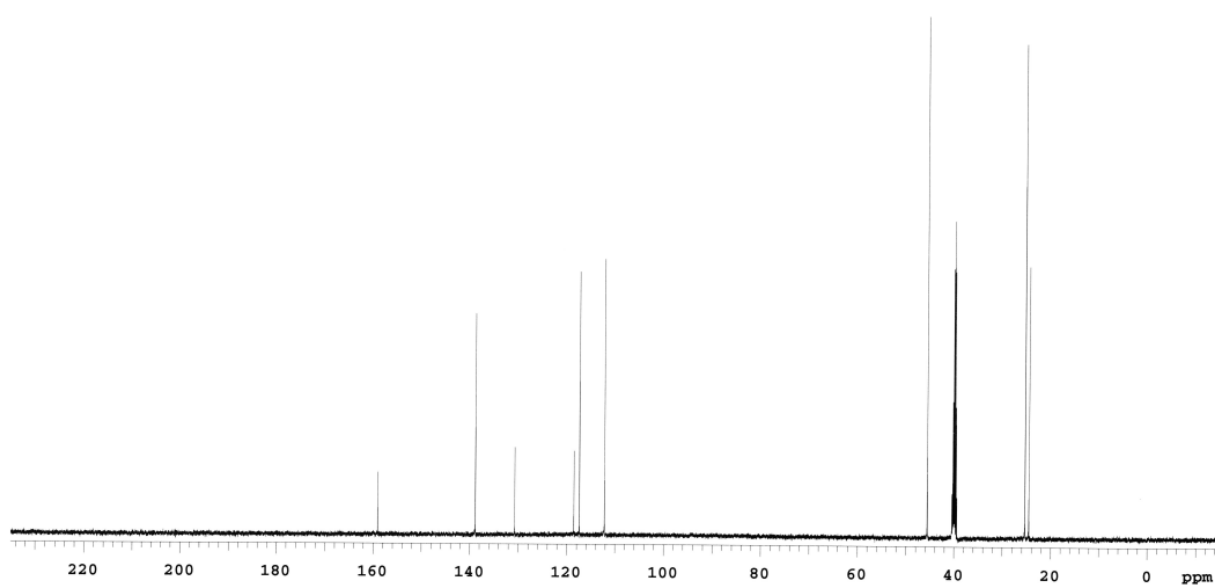

**Figure S4.** <sup>13</sup>C NMR spectrum (125 MHz, DMSO-*d*<sub>6</sub>) of compound **2**.

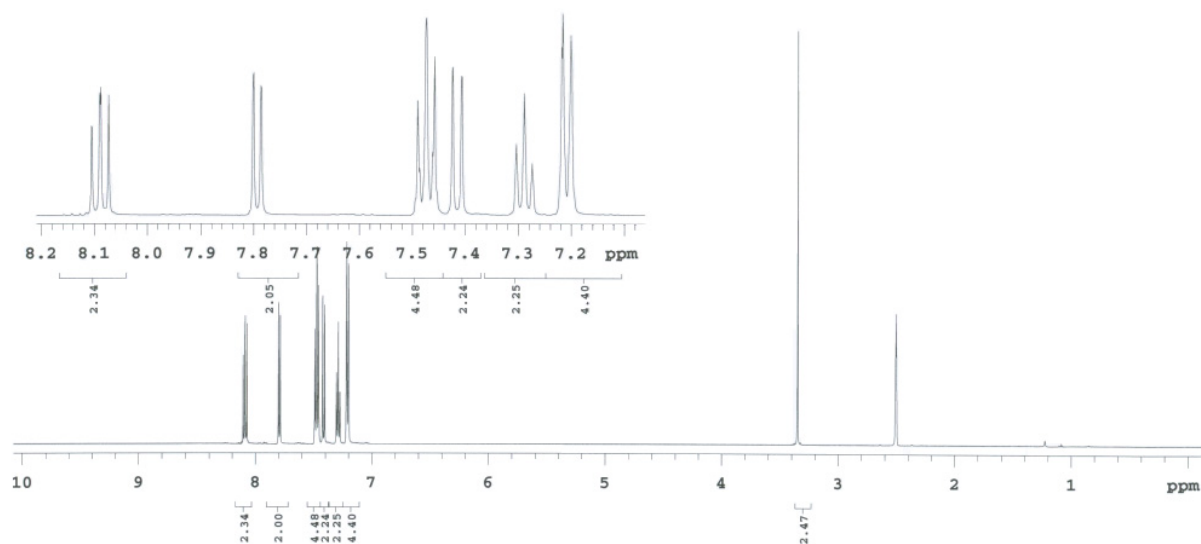

**Figure S5.** <sup>1</sup>H NMR spectrum (500 MHz, DMSO-*d*<sub>6</sub>) of compound 3.

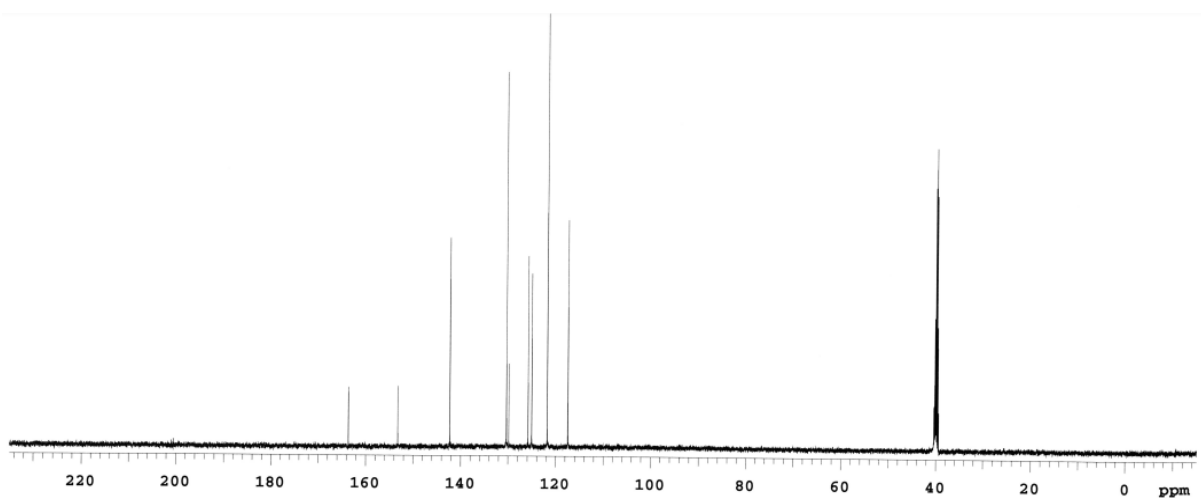

**Figure S6.** <sup>13</sup>C NMR spectrum (125 MHz, DMSO-*d*<sub>6</sub>) of compound 3.

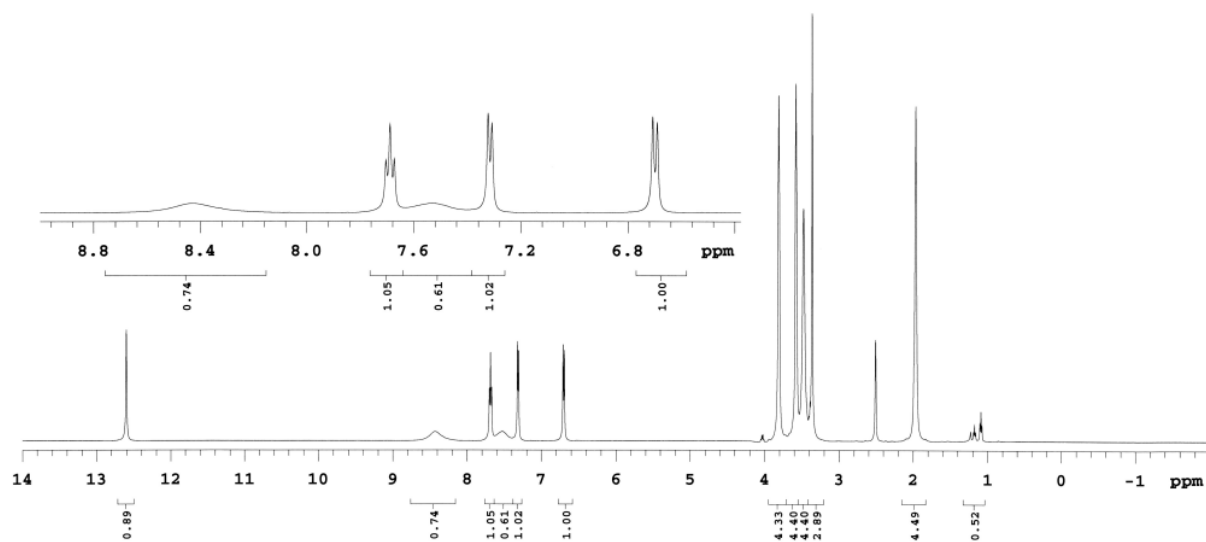

Figure S7. <sup>1</sup>H NMR spectrum (500 MHz, DMSO-*d*<sub>6</sub>) of compound 4.

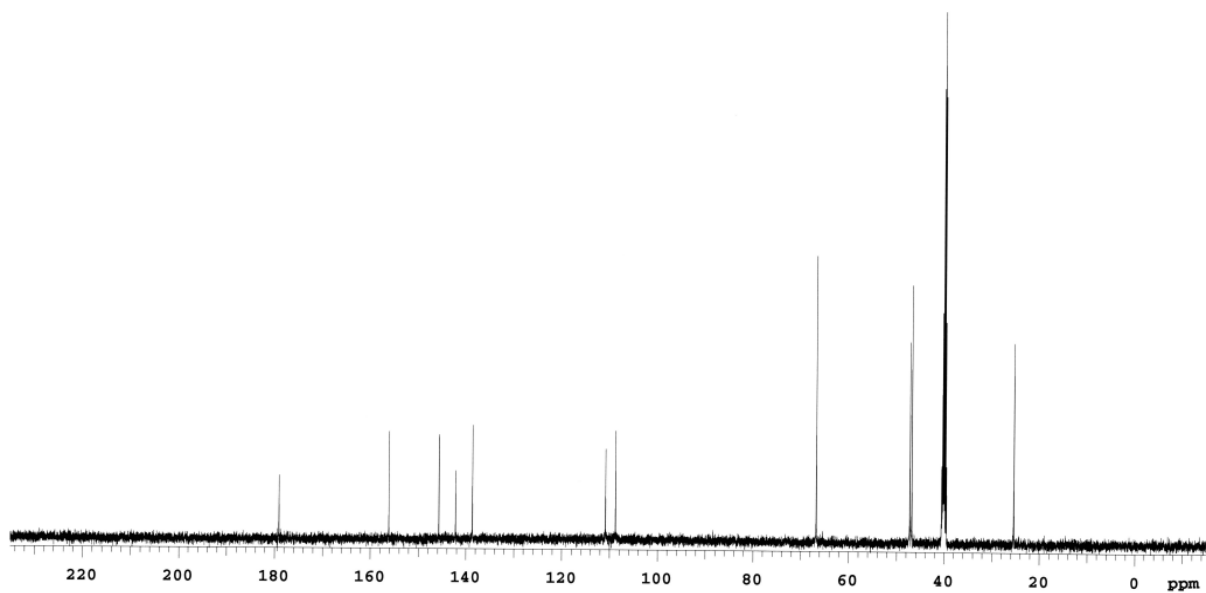

Figure S8. <sup>13</sup>C NMR spectrum (125 MHz, DMSO-*d*<sub>6</sub>) of compound 4.

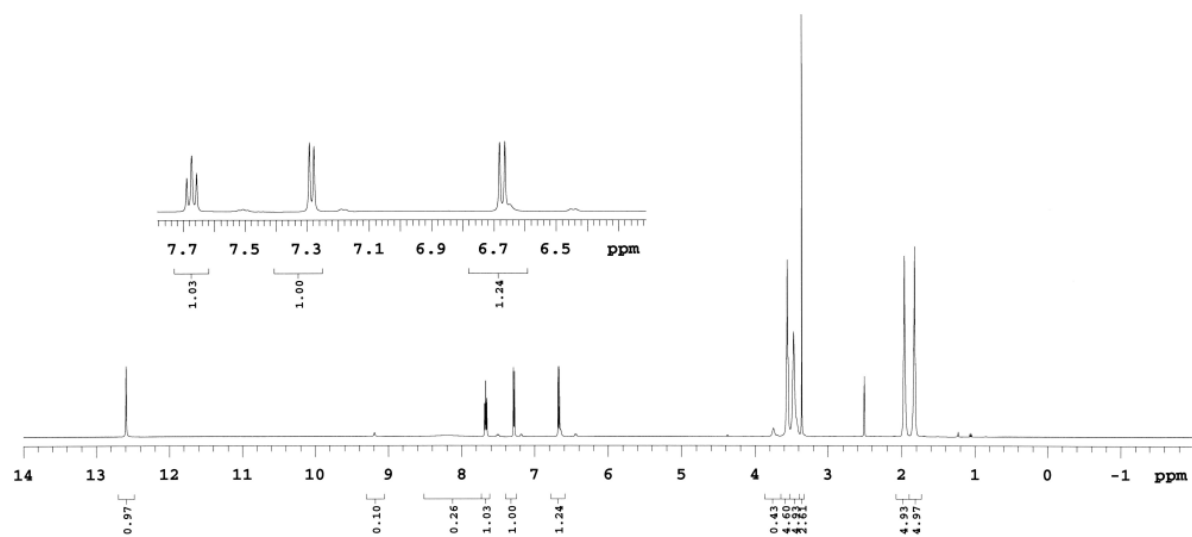

**Figure S9.** <sup>1</sup>H NMR spectrum (500 MHz, DMSO-*d*<sub>6</sub>) of compound 5.

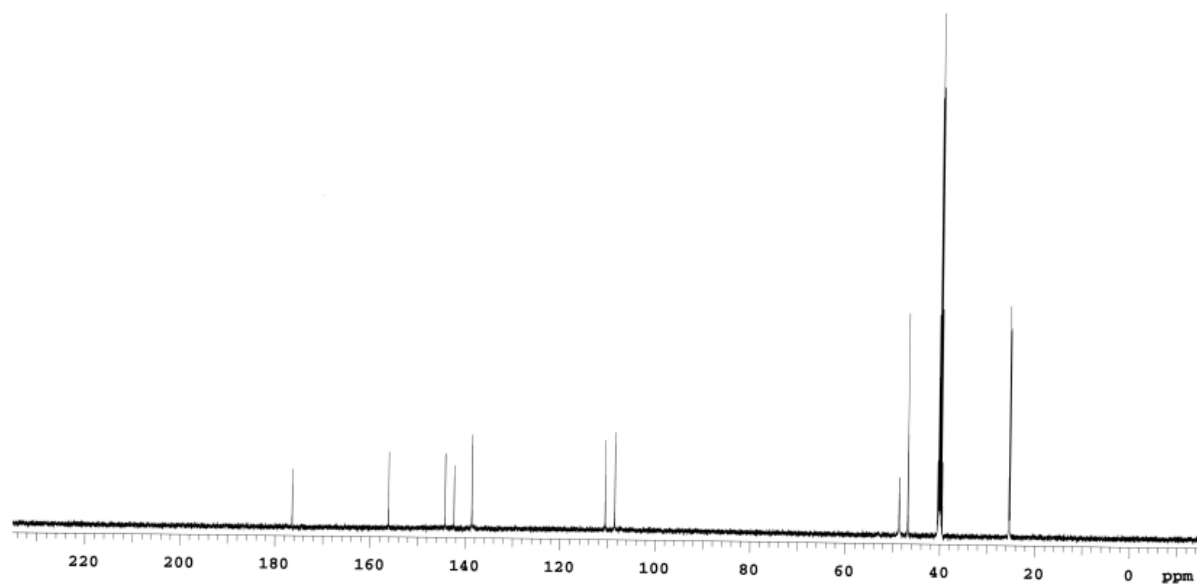

**Figure S10.** <sup>13</sup>C NMR spectrum (125 MHz, DMSO-*d*<sub>6</sub>) of compound 5.

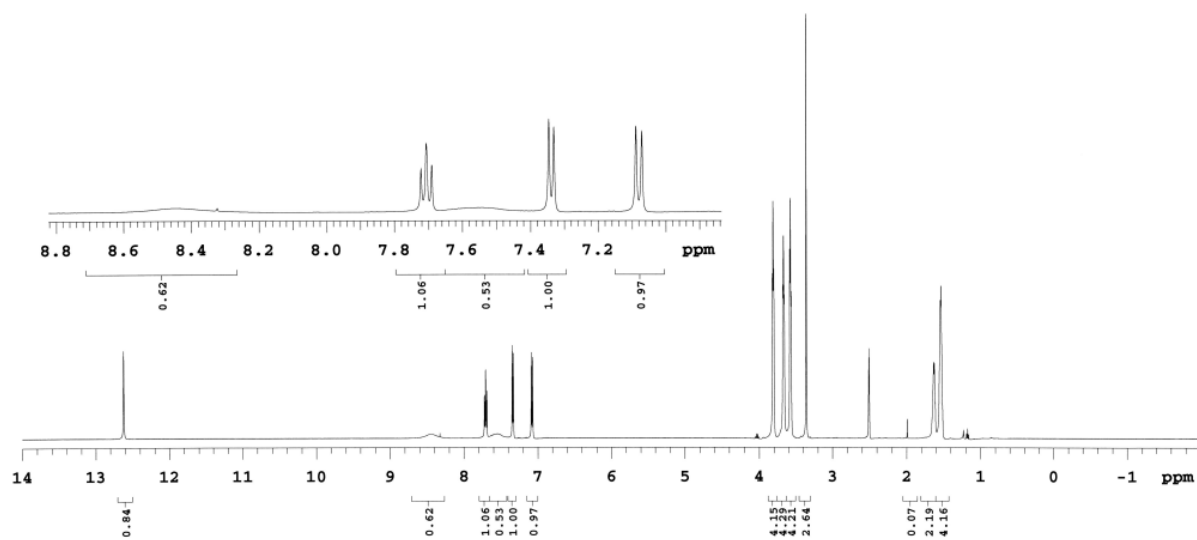

Figure S11. <sup>1</sup>H NMR spectrum (500 MHz, DMSO-*d*<sub>6</sub>) of compound 6.

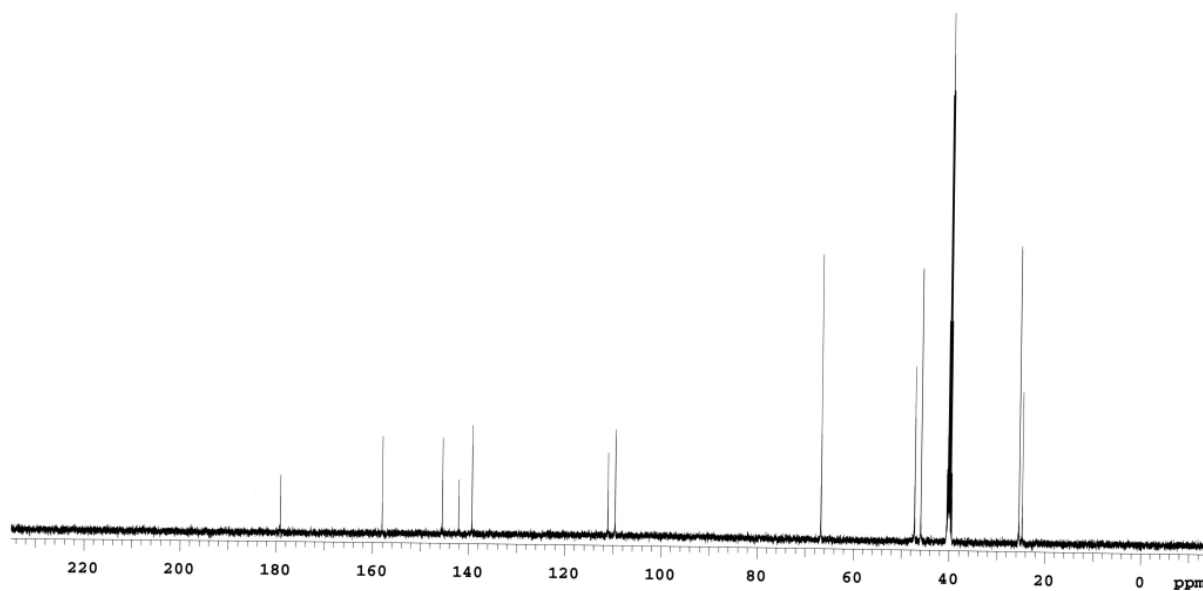

Figure S12. <sup>13</sup>C NMR spectrum (125 MHz, DMSO-*d*<sub>6</sub>) of compound 6.

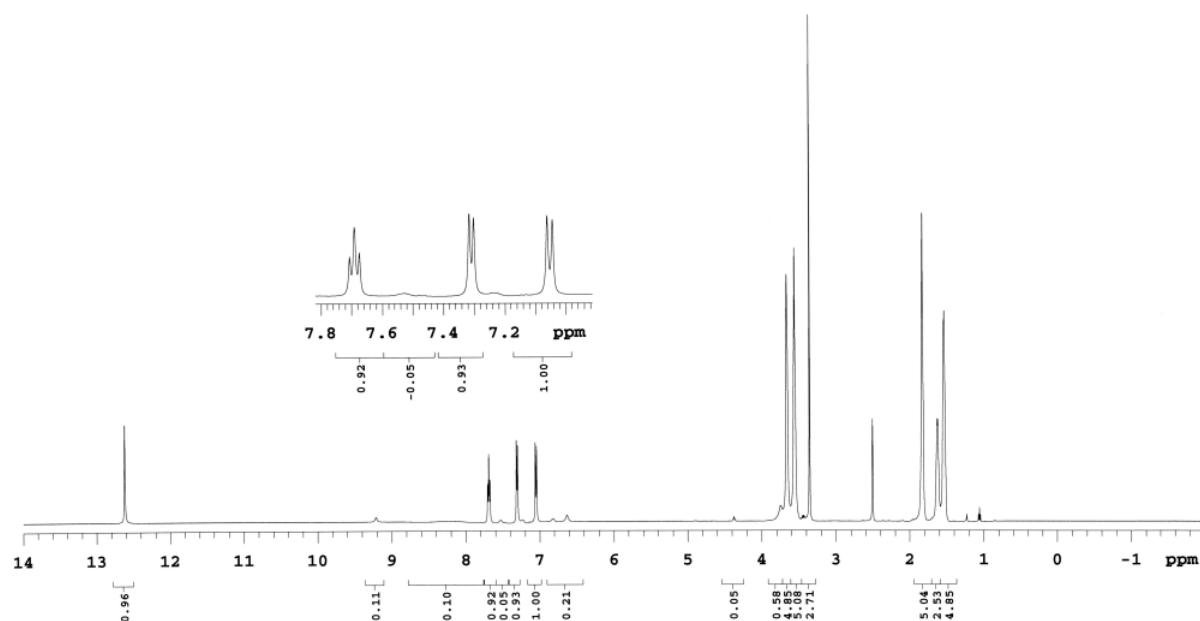

**Figure S13.** <sup>1</sup>H NMR spectrum (500 MHz, DMSO-*d*<sub>6</sub>) of compound 7.

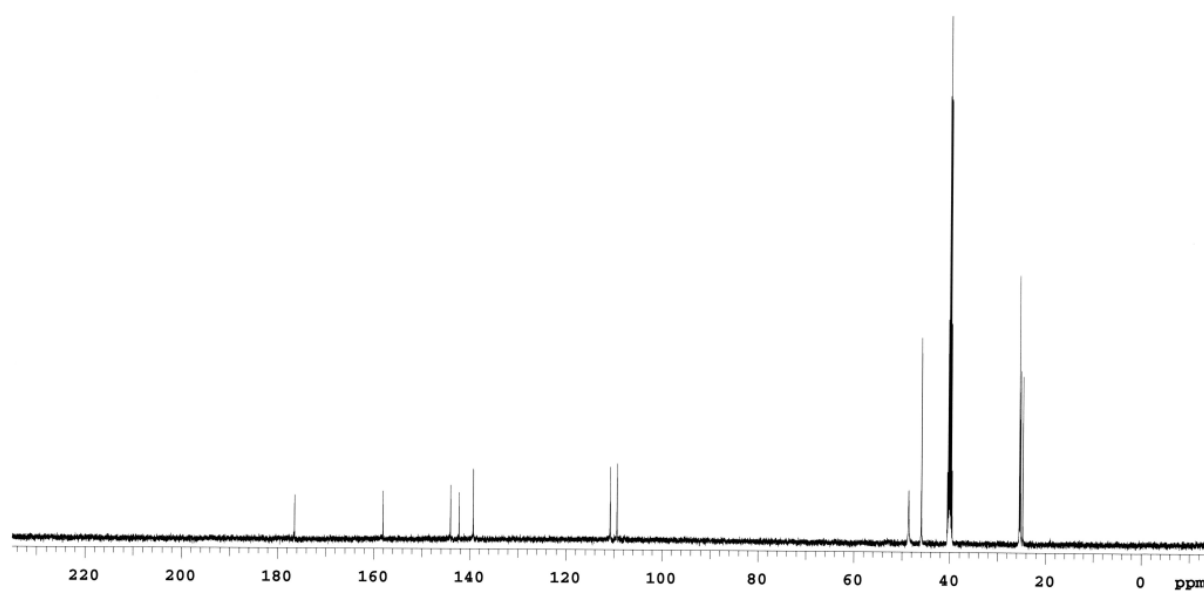

**Figure S14.** <sup>13</sup>C NMR spectrum (125 MHz, DMSO-*d*<sub>6</sub>) of compound 7.

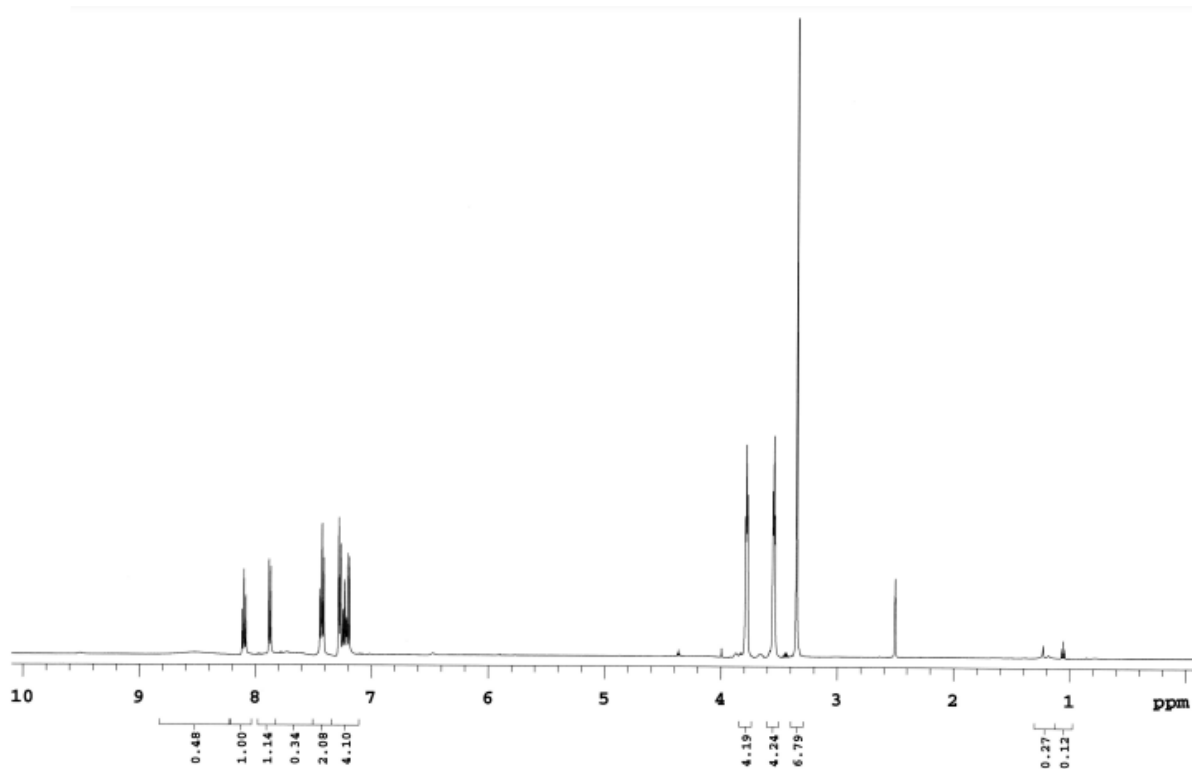

**Figure S15.** <sup>1</sup>H NMR spectrum (500 MHz, DMSO-*d*<sub>6</sub>) of compound 8.

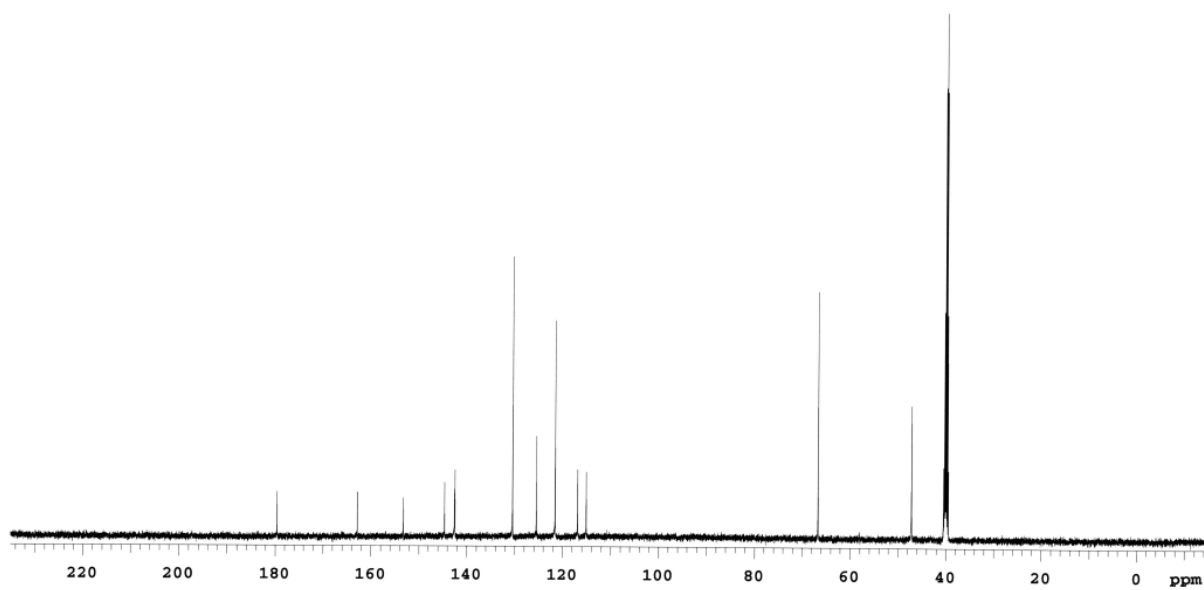

**Figure S16.** <sup>13</sup>C NMR spectrum (125 MHz, DMSO-*d*<sub>6</sub>) of compound 8.



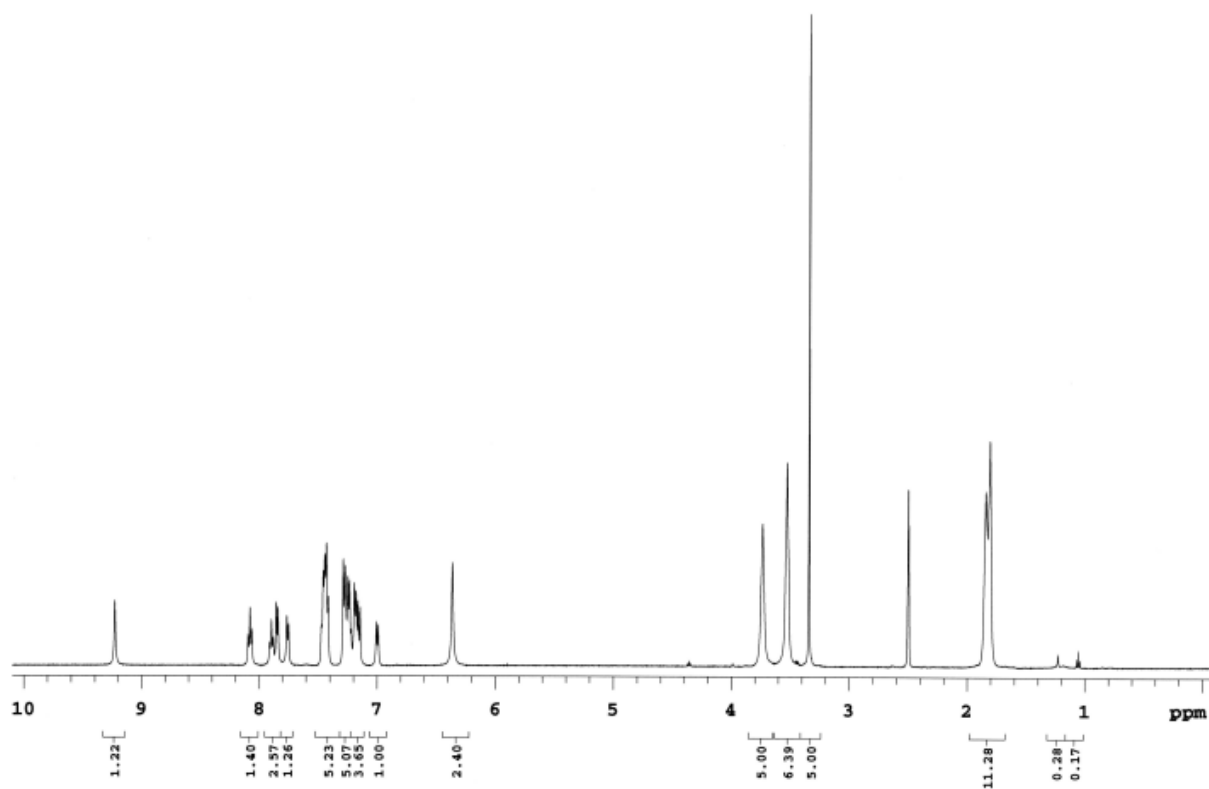

Figure S17.  $^1\text{H}$  NMR spectrum (500 MHz,  $\text{DMSO}-d_6$ ) of compound 9.

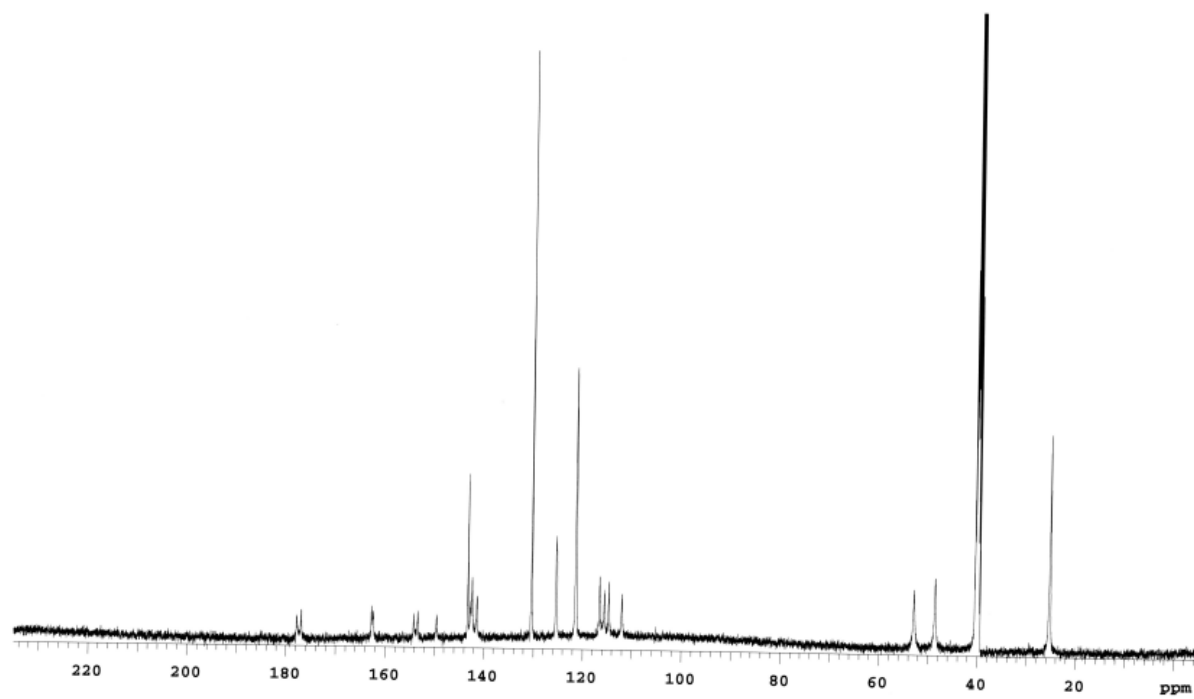

Figure S18.  $^{13}\text{C}$  NMR spectrum (125 MHz,  $\text{DMSO}-d_6$ ) of compound 9.
